# Supplementary material for: Gene products and processes contributing to lanthanide homeostasis and methanol metabolism in Methylorubrum extorquens AM1
Source: PubMed Central journal article supplement (PMC7391723; doi:10.1038/s41598-020-69401-4), 2020-07-29
Supplement: 41598_2020_69401_MOESM1_ESM.pdf [file 41598_2020_69401_MOESM1_ESM.pdf]

Supplementary information submitted to Scientific Reports

## **Gene products and processes contributing to lanthanide homeostasis and methanol metabolism in *Methylobacterium extorquens* AM1**

Paula Roszczenko-Jasińska,<sup>1,a,£</sup> Huong N. Vu,<sup>2,a,£</sup> Gabriel A. Subuyuj,<sup>2,a</sup> Ralph Valentine Crisostomo,<sup>2,a</sup> James Cai,<sup>2</sup> Nicholas F. Lien,<sup>2</sup> Erik J. Clippard,<sup>2</sup> Elena M. Ayala,<sup>2</sup> Richard T. Ngo,<sup>2</sup> Fauna Yarza,<sup>2,a</sup> Justin P. Wingett,<sup>2</sup> Charumathi Raghuraman,<sup>2</sup> Caitlin A. Hoeber,<sup>2</sup> Norma C. Martinez-Gomez,<sup>1,\*</sup> Elizabeth Skovran<sup>2,\*</sup>

<sup>1</sup>Department of Microbiology and Molecular Genetics, Michigan State University, East Lansing, USA

<sup>2</sup>Department of Biological Sciences, San José State University, San José, California, USA

£ Both authors contributed equally and share first authorship. *Author order was determined both alphabetically and in order of increasing seniority.*

\* Correspondence:

Norma Cecilia Martinez-Gomez, [mart1754@msu.edu](mailto:mart1754@msu.edu)

Elizabeth Skovran, [elizabeth.skovran@sjsu.edu](mailto:elizabeth.skovran@sjsu.edu)

<sup>a</sup> Present address: PR-J: Institute of Microbiology, University of Warsaw, Warsaw, Poland; HNV: Department of Microbiology, University of Georgia, Athens, Georgia; USA; GAS: Department of Microbiology and Molecular Genetics, University of California at Davis, Davis, California, USA; RVC: Molecular Biology Institute, University of California at Los Angeles, Los Angeles, California, USA; FY: Department of Biochemistry and Biophysics, University of California at San Francisco, San Francisco, California, USA

Table S1. Growth parameters for strains grown in methanol medium with and without La<sup>3+</sup>.

| Strain                                                                                   | Growth Rate (h <sup>-1</sup> ) <sup>‡</sup> |                        |
|------------------------------------------------------------------------------------------|---------------------------------------------|------------------------|
|                                                                                          | MeOH                                        | MeOH La <sup>3+</sup>  |
| <b>Growth of control strains</b>                                                         |                                             |                        |
| Wild type                                                                                | 0.14 ± 0.01                                 | 0.16 ± 0.01            |
| <i>mxoF</i>                                                                              | NG                                          | 0.16 ± 0.01            |
| <i>xoxF1</i>                                                                             | 30 h lag, 0.09 ± 0.01                       | 6-9 h lag, 0.07 ± 0.00 |
| <i>xoxF1 xoxF2</i>                                                                       | NG*                                         | 6 h lag, 0.04 ± 0.01   |
| <i>mxoF xoxF1 xoxF2</i>                                                                  | NG                                          | 6 h lag, 0.04 ± 0.00   |
| <b>Growth of strains defective in methanol metabolism independent of La<sup>3+</sup></b> |                                             |                        |
| <i>pqqBCDE</i>                                                                           | NG                                          | NG                     |
| <i>pqqF</i>                                                                              | NG                                          | NG                     |
| <i>cycK</i>                                                                              | NG                                          | NG                     |
| <i>ccmB</i>                                                                              | NG                                          | NG                     |
| <i>ccmC</i>                                                                              | NG                                          | NG                     |
| <i>META1_2359</i>                                                                        | NG*                                         | NG*                    |
| <i>META1_3908</i>                                                                        | 24 h lag, 0.05 ± 0.00                       | 15 h lag, 0.07 ± 0.00  |
| <i>META1p2024</i>                                                                        | 9 h lag, 0.09 ± 0.01                        | 6 h lag, 0.10 ± 0.01   |
| <i>META1_0863</i>                                                                        | 0.13 ± 0.00                                 | 0.14 ± 0.00            |

<sup>‡</sup>Data for a minimum of three biological replicates are reported.

\* indicates if a suppressor mutation allowed eventual growth of the strain.

NG indicates no growth. Methanol is abbreviated as MeOH.

Table S2. Strains and plasmids used in this study.

| Strain or plasmid    | Description                             | Reference  |
|----------------------|-----------------------------------------|------------|
| <i>M. extorquens</i> |                                         |            |
| AM1                  | Rif <sup>R</sup> derivative (wild type) | 1          |
| CM194.1              | $\Delta mxaF$                           | 2          |
| ES2813               | $\Delta mxaF \Delta fae$                | This study |
| ES2432               | $\Delta xoxF1$                          | This study |
| ES2435               | $\Delta xoxF2 \Delta xoxF1$             | This study |
| ES2439               | $\Delta mxaF \Delta xoxF2 \Delta xoxF1$ | This study |
| ES2386               | <i>pqqBCDE::Km</i>                      | This study |
| ES2360               | <i>pqqF::Km</i>                         | This study |
| ES3941               | <i>cycK::Km</i>                         | This study |
| ES3968               | <i>ccmB::Km</i>                         | This study |
| ES3965               | <i>ccmC::Km</i>                         | This study |
| ES2817               | $\Delta xoxG$                           | This study |
| ES2821               | $\Delta xoxJ$                           | This study |
| ES2785               | $\Delta META1p0863$                     | This study |
| ES3947               | <i>MexAM1_META1p1771::Km</i>            | This study |
| ES3282               | $\Delta orf6$                           | This study |
| ES2781               | $\Delta orf7$                           | This study |
| ES3962               | <i>MexAM1_META1p2359::Km</i>            | This study |
| ES3959               | <i>hss::Km</i>                          | This study |
| ES3257               | <i>MexAM1_META1p3908::Km</i>            | This study |
| ES2861               | <i>MexAM1_META1_3909::Km</i>            | This study |
| ES3950               | <i>lutA::Km</i>                         | This study |
| ES4122               | <i>lutB::Km</i>                         | This study |
| ES4444               | <i>lutC::Km</i>                         | This study |
| ES4389               | <i>lutD::Km</i>                         | This study |
| ES3953               | <i>lutE::Km</i>                         | This study |
| ES4249               | <i>lutF::Km</i>                         | This study |
| ES3956               | <i>lutG::Km</i>                         | This study |
| ES2879               | <i>lutH::Km</i>                         | This study |
| ES3983               | $\Delta mxaF lutA::Km$                  | This study |
| ES4124               | $\Delta mxaF lutB::Km$                  | This study |
| ES4447               | $\Delta mxaF lutC::Km$                  | This study |
| ES4392               | $\Delta mxaF lutD::Km$                  | This study |
| ES3986               | $\Delta mxaF lutE::Km$                  | This study |

Table S2. (continued)

| Strain or plasmid           | Description                                                                                   | Reference  |
|-----------------------------|-----------------------------------------------------------------------------------------------|------------|
| <b><i>M. extorquens</i></b> |                                                                                               |            |
| ES4246                      | $\Delta mxaF$ <i>lutF::Km</i>                                                                 | This study |
| ES3989                      | $\Delta mxaF$ <i>lutG::Km</i>                                                                 | This study |
| ES2962                      | $\Delta mxaF$ <i>lutH::Km</i>                                                                 | This study |
| ES2231                      | AM1 / pCM62                                                                                   | This study |
| ES4293                      | <i>lutA::Km</i> / pCM62                                                                       | This study |
| ES4295                      | <i>lutA::Km</i> / pES667                                                                      | This study |
| ES5029                      | <i>lutB::Km</i> / pCM62                                                                       | This study |
| ES5030                      | <i>lutB::Km</i> / pES810                                                                      | This study |
| ES4301                      | <i>lutE::Km</i> / pCM62                                                                       | This study |
| ES4305                      | <i>lutE::Km</i> / pES666                                                                      | This study |
| ES5031                      | <i>lutF::Km</i> / pCM62                                                                       | This study |
| ES5032                      | <i>lutF::Km</i> / pES815                                                                      | This study |
| ES4309                      | <i>lutG::Km</i> / pCM62                                                                       | This study |
| ES4315                      | <i>lutG::Km</i> / pES668                                                                      | This study |
| ES1819                      | AM1 / pES502                                                                                  | 3          |
| ES4192                      | $\Delta xoxF2$ $\Delta xoxF1$ / pES502                                                        | This study |
| ES4194                      | $\Delta xoxG$ / pES502                                                                        | This study |
| ES4196                      | $\Delta xoxJ$ / pES502                                                                        | This study |
| ES3743                      | AM1 / pHV25                                                                                   | This study |
| <b><i>E. coli</i></b>       |                                                                                               |            |
| TOP10                       | Cloning strain (Sm <sup>R</sup> )                                                             | Invitrogen |
| S17-1                       | Helper strain (Tp <sup>R</sup> , Sm <sup>R</sup> )                                            | 4          |
| <b>Plasmid</b>              |                                                                                               |            |
| pRK2013                     | Conjugative helper plasmid (Km <sup>R</sup> )                                                 | 5          |
| pCM184                      | Allelic exchange suicide vector (Km <sup>R</sup> , Tc <sup>R</sup> , Ap <sup>R</sup> )        | 6          |
| pHV2                        | Modified pCM184 expressing <i>sacB</i> (Km <sup>R</sup> , Tc <sup>R</sup> , Ap <sup>R</sup> ) | This study |
| pCM157                      | Modified pCM62 expressing <i>cre</i> (Tc <sup>R</sup> )                                       | 6          |
| pCM639                      | Modified pCM638 carrying IS <i>phoA</i> /hah-Tc (Tc <sup>R</sup> )                            | 2          |
| pAP5                        | Modified pCM62 carrying promoter-less <i>venus</i> (Tc <sup>R</sup> )                         | 5          |
| pCM62                       | Broad-host-range shuttle vector (Tc <sup>R</sup> )                                            | 7          |
| pES502                      | pAP5 carrying <i>mxo</i> promoter region upstream of <i>venus</i> (Tc <sup>R</sup> )          | 5          |
| pHV25                       | pAP5 carrying <i>lutH</i> promoter region upstream of <i>venus</i> (Tc <sup>R</sup> )         | This study |
| pES667                      | pCM62 carrying <i>lutA</i> downstream of P <sub>lac</sub> promoter (Tc <sup>R</sup> )         | This study |
| pES810                      | pCM62 carrying <i>lutB</i> downstream of P <sub>lac</sub> promoter (Tc <sup>R</sup> )         | This study |
| pES666                      | pCM62 carrying <i>lutE</i> downstream of P <sub>lac</sub> promoter (Tc <sup>R</sup> )         | This study |

Table S2. (continued)

| Strain or plasmid | Description                                                                           | Reference  |
|-------------------|---------------------------------------------------------------------------------------|------------|
| <b>Plasmid</b>    |                                                                                       |            |
| pES815            | pCM62 carrying <i>lutF</i> downstream of P <sub>lac</sub> promoter (Tc <sup>R</sup> ) | This study |
| pES668            | pCM62 carrying <i>lutG</i> downstream of P <sub>lac</sub> promoter (Tc <sup>R</sup> ) | This study |

## References

1. Nunn, D. N. & Lidstrom, M. E. Isolation and Complementation Analysis of 10 Methanol Oxidation Mutant Classes and Identification of the Methanol Dehydrogenase Structural Gene of *Methylobacterium* sp. Strain AM1. *J. Bacteriol.* **166**, 581–90 (1986).
2. Marx, C. J., Chistoserdova, L. & Lidstrom, M. E. Formaldehyde-detoxifying Role of the Tetrahydromethanopterin-linked Pathway in *Methylobacterium extorquens* AM1. *J. Bacteriol.* **185**, 7160–8 (2003).
3. Vu, H. N. *et al.* Lanthanide-dependent regulation of methanol oxidation systems in *Methylobacterium extorquens* AM1 and their contribution to methanol growth. *J. Bacteriol.* **198**, 1250–1259 (2016).
4. Figurski, D. H. & Helinski, D. R. Replication of an Origin-containing Derivative of Plasmid RK2 Dependent on a Plasmid Function Provided in Trans. *Proc. Natl. Acad. Sci. U. S. A.* **76**, 1648–52 (1979).
5. Skovran, E., Palmer, A. D., Rountree, A. M., Good, N. M. & Lidstrom, M. E. XoxF is Required for Expression of Methanol Dehydrogenase in *Methylobacterium extorquens* AM1. *J. Bacteriol.* **193**, 6032–6038 (2011).
6. Marx, C. J. & Lidstrom, M. E. Broad-host-range Cre-lox System for Antibiotic Marker Recycling in Gram-negative Bacteria. *Biotechniques* **33**, 1062–1067 (2002).
7. Marx, C. J. & Lidstrom, M. E. Development of Improved Versatile Broad-host-range Vectors for Use in Methylophages and Other Gram-negative Bacteria. *Microbiology* **147**, 2065–75 (2001).

Table S3. Primers used in this study.

| Primer name                                  | Sequence (5' to 3') <sup>‡</sup>     | Plasmid    | Gene                     |
|----------------------------------------------|--------------------------------------|------------|--------------------------|
| <b>Strain construction (pCM184 backbone)</b> |                                      |            |                          |
| xoxF_1740ULEcoRI                             | tagaattcGCCCCGATGGCAGGAATTAAGT       | pES319-320 | <i>xoxF1</i>             |
| xoxF_1740URKpnI                              | atggtaccCTGCTTCGGCTCGTACTTCCACA      |            |                          |
| xoxF_1740DLHpaI                              | tagttaacGCCTGTTCTACGTCCCCACCAAC      |            |                          |
| xoxF_1740DRSacI                              | tagagctcCTGCACCGACGAGACCAAGAAGA      |            |                          |
| exaF_1139ULEcoRI                             | gtgaattcCCTCCGACAGCCTACTGATGAAC      | pES3-4     | <i>exaF</i>              |
| exaF_1139URKpnI                              | caggtacCGTCTTGGCGTCGTTGAGGATGTC      |            |                          |
| exaF_1139DLHpaI                              | cagttaacGCCGTTCTGTGCCAACATCAACTG     |            |                          |
| exaF_1139DRSacI                              | tagagctcGTTGATGCCAGCCGTCGTCCTTGG     |            |                          |
| pqqBCDE_1748ULEcoRI                          | tagaattcTCAACATCCGCCAAGTCAGCTTC      | pES369-458 | <i>pqqBCDE</i>           |
| pqqBCDE_1748URKpnI                           | atggtaccATATCGGGAGAGGCGTTCAGCAG      |            |                          |
| pqqBCDE_1748DLHpaI                           | tatagttaacGACGAATGTGCAAAACCCGTTGA    |            |                          |
| pqqBCDE_1748DRSacI                           | tatagagctcACGTCCGGTCGGATAGTCGTTGTC   |            |                          |
| pqqF_2330ULEcoRI                             | tagaattcACCGTCCCGCCATCACCTATCGC      | pES789-555 | <i>pqqF</i>              |
| pqqF_2330URKpnI                              | atggtaccGTGATTCAGGCCTCGCTGCGGTC      |            |                          |
| pqqF_2330DLHpaI                              | tagttaacGGTGACCGGCTACCTGACCAAGG      |            |                          |
| pqqF_2330DRSacI                              | tagagctcGTAGCGCAGGCTGGCGATCATCT      |            |                          |
| lysR_0863ULEcoRI                             | atgaattcCAGGCGCTGTCGAAGCATTCAAG      | pES431-432 | <i>MexAM1_META1p0863</i> |
| lysR_0863URKpnI                              | atggtaccGGGTGTTCTCCAGCCTGAGCTTC      |            |                          |
| lysR_0863DLHpaI                              | tagttaacAGCGAGATGCCGACGATGGAGAG      |            |                          |
| lysR_0863DRSacI                              | tagagctcATGGACGTTGGAGAGGTGGATCT      |            |                          |
| sacB_BegNcoI                                 | tagcaccatggCGATCCTTTTTTAACCCATCACATA | pHV2       |                          |
| sacB_EndNcoI                                 | tataccatggGATATCGGCATTTTCTTTTGCG     |            |                          |

Table S3. (continued)

| Primer name                                | Sequence (5' to 3') <sup>‡</sup>             | Plasmid    | Gene                     |
|--------------------------------------------|----------------------------------------------|------------|--------------------------|
| <b>Strain construction (pHV2 backbone)</b> |                                              |            |                          |
| fae1_1767UBMunI                            | tata <b>caattg</b> CGCGGTTTCATCTCGCCTATCTCA  | pES498-499 | <i>faeI</i>              |
| fae1_1767UENcoI                            | tata <b>ccatgg</b> CCGTGCTTGTGTTGACCAGACC    |            |                          |
| fae1_1767DBAgeI                            | ctct <b>accggt</b> TTGTCACGGAGCAGCGTAAGTCG   |            |                          |
| fae1_1767DESacI                            | tata <b>gagctc</b> GTGACGCTGTGGGTCGATGC      |            |                          |
| cycK_1293UBAatII                           | tata <b>gagctc</b> CCAGCCTGAAGGAACGAGAAGAAGC | pES604-605 | <i>cycK</i>              |
| cycK_1293UENcoI                            | tata <b>ccatgg</b> CGGGCATCACAGCTTGCACCA     |            |                          |
| cycK_1293DBBshTI                           | tata <b>accggt</b> CGGTCGGCGTCAGCCAGAT       |            |                          |
| cycK_1293DESacI                            | tata <b>gagctc</b> GTGACGACGATGCGCCGGAC      |            |                          |
| ccmB_2825UBAatII                           | tata <b>gagctc</b> CCATGTGGCATCACCGAATCAATGC | pES622-623 | <i>ccmB</i>              |
| ccmB_2825UENcoI                            | taat <b>ccatgg</b> TCAGGAAGAAGACGAGCGAGAGC   |            |                          |
| ccmB_2825DBBshTI                           | tata <b>accggt</b> GCTGATGGTCCCGACTCTGATCTT  |            |                          |
| ccmB_2825DESacI                            | tata <b>gagctc</b> AACCGATGTGAGGCCGATCTCC    |            |                          |
| ccmC_2732UBAatII                           | tata <b>gagctc</b> AGAGACTGAGCGGGACCAAGC     | pES620-621 | <i>ccmC</i>              |
| ccmC_2732UENcoI                            | tata <b>ccatgg</b> CCAGTAGGTCCCCCACATCGG     |            |                          |
| ccmC_2732DBBshTI                           | tata <b>accggt</b> CTCGATGCTCTACCCGCTGCTC    |            |                          |
| ccmC_2732DESacI                            | atat <b>gagctc</b> GGTCGCGTGCGGGATCTG        |            |                          |
| ABC2_2359UBAatII                           | atat <b>gagctc</b> TGCGTATGCGATGGTTCAGACAA   | pES618-619 | <i>MexAM1_META1p2359</i> |
| ABC2_2359UENcoI                            | tata <b>ccatgg</b> AGCGGAAACACGATGAGTGGAATCG |            |                          |
| ABC2_2359DBBshTI                           | tata <b>accggt</b> CTGGACGGCATCTCCTTCACGG    |            |                          |
| ABC2_2359DESacI                            | tata <b>gagctc</b> CGAGAGCATCCCGTTGATCCGAA   |            |                          |

Table S3. (continued)

| Primer name                                | Sequence (5' to 3') <sup>‡</sup>                | Plasmid    | Gene                     |
|--------------------------------------------|-------------------------------------------------|------------|--------------------------|
| <b>Strain construction (pHV2 backbone)</b> |                                                 |            |                          |
| 25pep_3908UBBglII                          | ctag <b>agatct</b> GGTACACAGGTTGCGCCGGTTTTTC    | pES467-468 | <i>MexAM1_META1p3908</i> |
| 25pep_3908UENcoI                           | tata <b>ccatgg</b> GCCTCGTCCTCGTCCTTCTTCTT      |            |                          |
| 25pep_3908DBAgeI                           | atata <b>accggt</b> CCTACAAGCCCAAGGCGATGATC     |            |                          |
| 25pep_3908DESacI                           | tata <b>gagctc</b> CGGTCAGGAAGACGACGAACAGG      |            |                          |
| 25mem_3909UBBglII                          | tata <b>agatct</b> GACCTACAAGCCCAAGGCGATGA      | pES469-470 | <i>MexAM1_META1p3909</i> |
| 25mem_3909UENcoI                           | atata <b>ccatgg</b> CGGTCAGGAAGACGACGAACAGG     |            |                          |
| 25pep_3909DBAgeI                           | tata <b>accggt</b> CACGCCGATGGTGATCGCCTATG      |            |                          |
| 25pep_3909DESacI                           | tata <b>gagctc</b> CGCTGCCGTTCTCACTTCCCTTG      |            |                          |
| hss_2024UBAatII                            | tata <b>gagctc</b> CGTCATGGGATTAAGTGCGAAACAGG   | pES616-617 | <i>hss</i>               |
| hss_2024UENcoI                             | atata <b>ccatgg</b> CGGCTCTTGTCGTA CT CGAAATGGC |            |                          |
| hss_2024DBBshTI                            | tata <b>accggt</b> GACCTGCCACTACGCCTACCAC       |            |                          |
| hss_2024DESacI                             | atata <b>gagctc</b> TGCGAAGGCCCGAACCGTAAC       |            |                          |
| xoxG_1741UBBglII                           | tata <b>agatct</b> GCAACTTCATCGCCTGGGACAAC      | pES459-460 | <i>xoxG</i>              |
| xoxG_1741UEKpnI                            | acgt <b>ggtagc</b> CGTCGTTGGTGATGTGGAAGGTC      |            |                          |
| xoxG_1741DBAgeI                            | atata <b>accggt</b> GCGAGAAGGAAGACAAGCCCG       |            |                          |
| xoxG_1741DESacI                            | tata <b>gagctc</b> AATCGAGCGGGTGG AATGAGAA      |            |                          |
| xoxJ_1742UBBglII                           | atata <b>agatct</b> TCTTCTTGGTCTCGTCGGTGCAG     | pES461-462 | <i>xoxJ</i>              |
| xoxJ_1742UEKpnI                            | tata <b>ggtagc</b> CGCAGCTTGACCTTCAGCTCGTC      |            |                          |
| xoxJ_1742DBAgeI                            | tata <b>accggt</b> GCCACAACGAGAACGACTGGAAG      |            |                          |
| xoxJ_1742DESacI                            | tata <b>gagctc</b> CTATCTCGGGCTCGGCAGCAATA      |            |                          |



Table S3. (continued)

| Primer name                                | Sequence (5' to 3') <sup>‡</sup>     | Plasmid    | Gene                     |
|--------------------------------------------|--------------------------------------|------------|--------------------------|
| <b>Strain construction (pHV2 backbone)</b> |                                      |            |                          |
| xoxD_1771UBAatII                           | tatagacgctGCCATGCCGAGTTCGAGGTG       | pES608-609 | <i>MexAM1_META1p1771</i> |
| xoxD_1771UENcoI                            | attaccatggACCCTTGCCCTCGGTCTTCTC      |            |                          |
| xoxD_1771DBBshTI                           | atataccggtGTGAAGGCCAAGGCCGAGAAG      |            |                          |
| xoxD_1771DESacI                            | tatagagctcAGTCGGATTCGCGGTTGGCTAC     |            |                          |
| orf6_1746UBMunI                            | atatacaattgGAGCAGCCGCAGATGAAGAACAC   | pES493-494 | <i>MexAM1_META1p1746</i> |
| orf6_1746UENcoI                            | atataccatggGTCGGTCCGATAGTCGTTGTCGT   |            |                          |
| orf6_1746DBAgeI                            | atacaccggtCCTGCCCTATGACCGCTACGTT     |            |                          |
| orf6_1746DESacI                            | atatagagctcCCGGCATTCCAACGAGATGTAGA   |            |                          |
| orf7_1747UBMunI                            | atatacaattgTTACGGCTGGGCCTATGTGAACC   | pES495-496 | <i>MexAM1_META1p1747</i> |
| orf7_1747UENcoI                            | atataccatggGTGTTCTTCATCTGCGGCTGCTC   |            |                          |
| orf7_1747DBAgeI                            | atataccggtCCAACCCGCGCTACATCAAGAAC    |            |                          |
| orf7_1747DESacI                            | atatagagctcTGACGTTGAGGATGCCATTACC    |            |                          |
| lutA_1778UBAatII                           | tatagacgctGGACGGGCTTTAACTCGGTTTCC    | pES610-611 | <i>lutA</i>              |
| lutA_1778UENcoI                            | tataccatggGGCGAAGGTCTGCTTGGTGAAG     |            |                          |
| lutA_1778DBBshTI                           | taataccggtGACTGGGGCGATTATGTCCCGT     |            |                          |
| lutA_1778DESacI                            | tatagagctcCCGTCGCTCAAACAAGAAACAGATGA |            |                          |
| lutB_1779UBAatII                           | atatagagctcGCAAGTTCGGCCTCAAGATCACC   | pES638-639 | <i>lutB</i>              |
| lutB_1779UENcoI                            | atataccatggGGCCTTCTCGTTGGTGACGTAGG   |            |                          |
| lutB_1779DBAgeI                            | atataccggtCTCTACACGACCAACGGCACCTC    |            |                          |
| lutB_1779DESacII                           | atatagagctcCCCCCTCACTTCACCGTAATCGT   |            |                          |

Table S3. (continued)

| Primer name                                | Sequence (5' to 3') <sup>‡</sup>              | Plasmid    | Gene        |
|--------------------------------------------|-----------------------------------------------|------------|-------------|
| <b>Strain construction (pHV2 backbone)</b> |                                               |            |             |
| lutC_1780UBMunI                            | atat <b>caattg</b> GAGGTGATCGACAACGTGCTGGT    | pES642-643 | <i>lutC</i> |
| lutC_1780UENcoI                            | atat <b>ccatgg</b> GTTCTGCCGCTTCTTGGTGAGGT    |            |             |
| lutC_1780DBMluI                            | atata <b>acgct</b> CGGCACGATTACGGTGAAGTGAG    |            |             |
| lutC_1780DESacI                            | atat <b>gagctc</b> GCTGGCGTGGTAATGCAGGTTTT    |            |             |
| lutD_1781UBBgIII                           | atata <b>gatct</b> TGTCCGAGAAGGCGATGCAAG      | pES644-645 | <i>lutD</i> |
| lutD_1781UEMunI                            | atat <b>caattg</b> CAAGCACCACGAGGGCAAGC       |            |             |
| lutD_1781DBAgeI                            | atata <b>ccggt</b> GAGCAAGGCGAGGGCGAGTT       |            |             |
| lutD_1781DESacI                            | atg <b>gagctc</b> ATCGAGGTGCCGAGCGTGTT        |            |             |
| lutE_1782UBAatII                           | tata <b>gagctc</b> GTCCGAGAAGGCGATGCAAGAAC    | pES612-613 | <i>lutE</i> |
| lutE_1782UENcoI                            | tata <b>ccatgg</b> CGGCCCTCCTGATTGTTGTAGAGC   |            |             |
| lutE_1782DBBshTI                           | tata <b>accggt</b> CGACAAGAGAGCCGTGAAGTCCG    |            |             |
| lutE_1782DESacI                            | tata <b>gagctc</b> CAGAGCGGATATAGGGCAGAAGAGG  |            |             |
| lutF_1783UBAatII                           | tatc <b>gagctc</b> ACCCGGCTCTACAACAATCAGGAG   | pES640-641 | <i>lutF</i> |
| lutF_1783UENcoI                            | atat <b>ccatgg</b> TTCTGGTGGAAGAAACGCAGCAG    |            |             |
| lutF_1783DBAgeI                            | atata <b>ccggt</b> CGAATTGGTGCGTTTCGCTCTCT    |            |             |
| lutF_1783DESacI                            | atat <b>gagctc</b> TCGCAGACGTAGGAGACCGACTG    |            |             |
| lutG_1784UBAatII                           | tata <b>gagctc</b> GCTGGTCTGGCTGTTTCATCTTCG   | pES614-615 | <i>lutG</i> |
| lutG_1784UENcoI                            | atat <b>ccatgg</b> TAGCCCAGCGTCGTCACCTTG      |            |             |
| lutG_1784DBBshTI                           | tata <b>accggt</b> CGGACAAGGTGAGCGAGTTCAAGGA  |            |             |
| lutG_1784DESacI                            | tata <b>gagctc</b> GCAACATATTTCTGCCGTTCCGTCAA |            |             |

Table S3. (continued)

| Primer name                                            | Sequence (5' to 3') <sup>‡</sup>             | Plasmid    | Gene        |
|--------------------------------------------------------|----------------------------------------------|------------|-------------|
| <b>Strain construction (pHV2 backbone)</b>             |                                              |            |             |
| lutH_1785UBBgII                                        | atata <b>gatct</b> TGCCGAATGATCCCGGTAAAGTC   | pES465-466 | <i>lutH</i> |
| lutH_1785UENcoI                                        | tata <b>ccatgg</b> CGAACGAGGTGTTGAAACGAGCA   |            |             |
| lutH_1785DBAgeI                                        | atata <b>ccgg</b> tCCCTGCTCGCTCACCAACTTCTT   |            |             |
| lutH_1785DESacI                                        | atata <b>gagctc</b> TTCGGCCTCGCTTAGATTGCGTA  |            |             |
| <b>Transcriptional reporter fusion (pAP5 backbone)</b> |                                              |            |             |
| lutH_1785BegAclI                                       | tataa <b>acgtt</b> GCAGCCGTCGAAGCGATTTGC     | pHV25      | <i>lutH</i> |
| lutH_1785EndEcoRI                                      | tata <b>gaattc</b> CCGAACGAGGTGTTGAAACGAGC   |            |             |
| <b>Complementation (pCM62 backbone)</b>                |                                              |            |             |
| lutA_1778BegKpnI                                       | atata <b>ggtacc</b> CTTATGCTTCTCTCGTTGAGGCCG | pES667     | <i>lutA</i> |
| lutA_1778EndSacI                                       | atc <b>ggagctc</b> ATCGCCCGGATCGCTTCC        |            |             |
| lutB_1779BegKpnI                                       | tattt <b>ggtacc</b> AAGCGATCCGGGCGATGC       | pES810     | <i>lutB</i> |
| lutB_1779EndSacI                                       | tattt <b>gagctc</b> ACCTTTCGGGACGATGCCTTAGC  |            |             |
| lutE_1782BegKpnI                                       | atata <b>ggtacc</b> GAGCAAGGCGAGGGCGAGTT     | pES666     | <i>lutE</i> |
| lutE_1782EndKpnI                                       | atata <b>gagctc</b> GGCGGGATTCGAGGGAGACC     |            |             |
| lutF_1783BegKpnI                                       | tattt <b>ggtacc</b> AAGGGTCGCATCGTCGCCCGTGG  | pES815     | <i>lutF</i> |
| lutF_1783EndSacI                                       | tattt <b>gagctc</b> ACGAGCCGTAGCCCAGCGTCG    |            |             |
| lutG_1784BegKpnI                                       | atata <b>ggtacc</b> GCCGCAATCGCCTACGATCC     | pES668     | <i>lutG</i> |
| lutG_1784EndSacI                                       | atata <b>gagctc</b> CTTCGTCGCTTCCGACCGAAAG   |            |             |

<sup>‡</sup>Restriction endonuclease sites are in bolded font. Capitalized letters represent bases that anneal to the target DNA sequence.
