# Supplementary material for: Gene products and processes contributing to lanthanide homeostasis and methanol metabolism in Methylorubrum extorquens AM1
Source: PubMed Central journal article supplement (PMC7391723; doi:10.1038/s41598-020-69401-4), 2020-07-29
Supplement: 41598_2020_69401_MOESM2_ESM.pdf [file 41598_2020_69401_MOESM2_ESM.pdf]

Supplementary information submitted to Scientific Reports

**Gene products and processes contributing to lanthanide homeostasis and methanol metabolism in *Methylobacterium extorquens* AM1**

Paula Roszczenko-Jasińska,<sup>1,a,£</sup> Huong N. Vu,<sup>2,a,£</sup> Gabriel A. Subuyuj,<sup>2,a</sup> Ralph Valentine Crisostomo,<sup>2,a</sup> James Cai,<sup>2</sup> Nicholas F. Lien,<sup>2</sup> Erik J. Clippard,<sup>2</sup> Elena M. Ayala,<sup>2</sup> Richard T. Ngo,<sup>2</sup> Fauna Yarza,<sup>2,a</sup> Justin P. Wingett,<sup>2</sup> Charumathi Raghuraman,<sup>2</sup> Caitlin A. Hoeber,<sup>2</sup> Norma C. Martinez-Gomez,<sup>1,\*</sup> Elizabeth Skovran<sup>2,\*</sup>

<sup>1</sup>Department of Microbiology and Molecular Genetics, Michigan State University, East Lansing, USA

<sup>2</sup>Department of Biological Sciences, San José State University, San José, California, USA

£ Both authors contributed equally and share first authorship. *Author order was determined both alphabetically and in order of increasing seniority.*

\* Correspondence:

Norma Cecilia Martinez-Gomez, [mart1754@msu.edu](mailto:mart1754@msu.edu)  
Elizabeth Skovran, [elizabeth.skovran@sjsu.edu](mailto:elizabeth.skovran@sjsu.edu)

<sup>a</sup> Present address: PR-J: Institute of Microbiology, University of Warsaw, Warsaw, Poland; HNV: Department of Microbiology, University of Georgia, Athens, Georgia, USA; GAS: Department of Microbiology and Molecular Genetics, University of California at Davis, Davis, California, USA; RVC: Molecular Biology Institute, University of California at Los Angeles, Los Angeles, California, USA; FY: Department of Biochemistry and Biophysics, University of California at San Francisco, San Francisco, California, USA

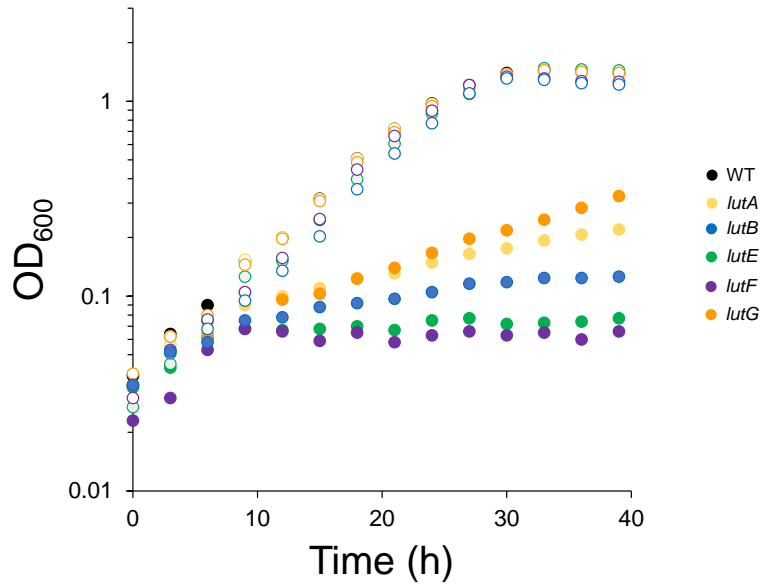

**Fig S1. Complementation studies for the *lut* mutant strains.** Graphs depict representative data from biological triplicates grown in methanol media (125 mM) containing 2  $\mu$ M LaCl<sub>3</sub> and 5  $\mu$ g/mL Tc. Filled circles represent wild type (WT) and mutant strains carrying the pCM62 empty vector. Empty circles represent each mutant strain with the respective gene cloned into pCM62.

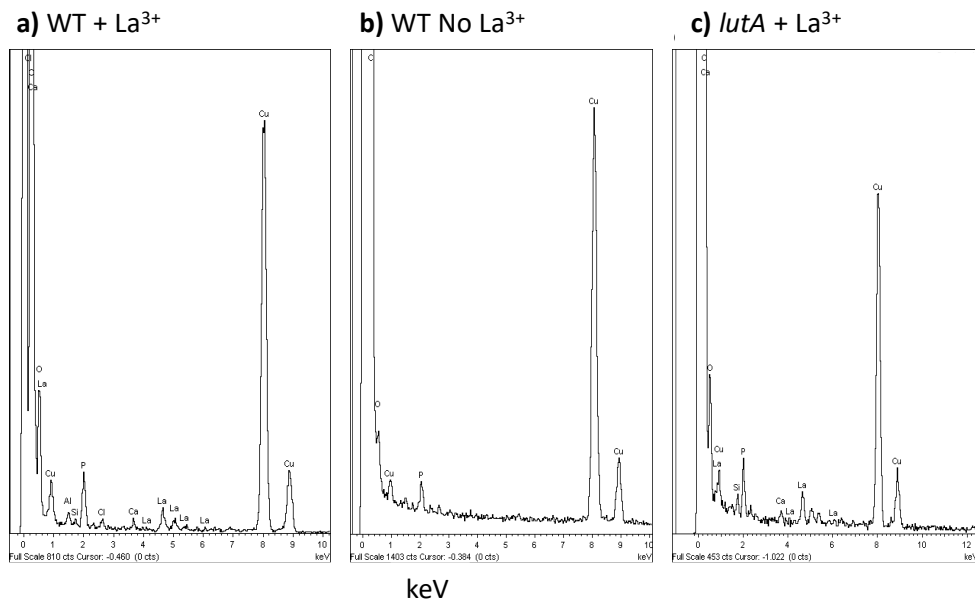

**Fig S2. Elemental analysis of cytoplasmic deposits.** Whole spectra of energy-dispersive X-ray analysis of the electron-dense deposits observed in the (a) cytoplasm of the wild-type (WT) strain grown with 20  $\mu\text{M}$   $\text{LaCl}_3$  (b) cytoplasm of the wild-type strain grown without  $\text{LaCl}_3$  and (c) periplasm of the *lutA* mutant strain grown with 20  $\mu\text{M}$   $\text{LaCl}_3$ . Microscopic images of these samples are depicted in Fig. 6 panels c and g and Fig. 7 panel f, respectively. Copper, carbon and silicon ion content is a result of these metals being present in the grids.
